# Supplementary material for: Population Structure and Phylogeography of Marine Gastropods Monodonta labio and M. confusa (Trochidae) along the Northwestern Pacific Coast
Source: MDPI journal article supplement (doi:10.3390/d15091021), 2023-09-17
Supplement: s1 [file s1]

**Table S1** The distribution information of the shared haplotypes (Hm1-Hm 94) (COI + 16S) in *Monodonta labio* and *M. confusa*. P indicate the number of the private haplotypes in each population.

The bold text represents the haplotypes found in *M. confusa*.

|             | AD       | CF       | CG | GJ       | KM | MZ       | OK | PH       | SI | SY | TD | WW | YG |
|-------------|----------|----------|----|----------|----|----------|----|----------|----|----|----|----|----|
| P           | 12       | 10       | 11 | 4        | 8  | 12       | 10 | 16       | 6  | 14 | 5  | 6  | 12 |
| Hm1         | 1        |          |    |          |    |          |    |          |    |    |    |    |    |
| Hm2         | 1        |          |    |          |    |          |    |          |    |    |    |    |    |
| <b>Hm3</b>  | <b>1</b> |          |    |          |    | <b>1</b> |    |          |    |    |    |    |    |
| <b>Hm4</b>  | <b>1</b> |          |    |          |    |          |    |          |    |    |    |    |    |
| <b>Hm5</b>  | <b>1</b> |          |    |          |    |          |    | <b>1</b> |    |    |    |    |    |
| <b>Hm6</b>  | <b>1</b> |          |    |          |    |          |    |          |    |    |    |    |    |
| <b>Hm7</b>  | <b>1</b> |          |    |          |    |          |    |          |    |    |    |    |    |
| <b>Hm8</b>  | <b>1</b> |          |    |          |    |          |    |          |    |    |    |    |    |
| <b>Hm9</b>  | <b>1</b> |          |    |          |    |          |    |          |    |    |    |    |    |
| Hm10        | 1        |          |    |          |    |          |    |          |    |    |    |    |    |
| Hm11        | 1        |          |    |          |    |          |    |          |    |    |    |    |    |
| Hm12        | 1        |          |    |          |    |          |    |          |    |    |    |    |    |
| <b>Hm13</b> |          | <b>1</b> |    |          |    |          |    |          |    |    |    |    |    |
| <b>Hm14</b> |          | <b>1</b> |    |          |    |          |    |          |    |    |    |    |    |
| <b>Hm15</b> |          | <b>4</b> |    | <b>1</b> |    |          |    |          |    |    |    |    |    |
| <b>Hm16</b> |          | <b>1</b> |    |          |    |          |    |          |    |    |    |    |    |
| <b>Hm17</b> |          | <b>1</b> |    |          |    |          |    |          |    |    |    |    |    |
| <b>Hm18</b> |          | <b>1</b> |    |          |    |          |    |          |    |    |    |    |    |
| <b>Hm19</b> |          | <b>1</b> |    |          |    |          |    |          |    |    |    |    |    |
| Hm20        |          |          | 1  |          |    |          |    |          |    |    |    |    |    |
| Hm21        |          |          | 1  |          |    |          |    |          |    |    |    |    |    |
| Hm22        |          |          | 1  |          |    |          |    |          |    |    |    |    |    |
| Hm23        |          |          | 1  |          |    |          |    |          |    |    |    |    |    |
| Hm24        |          |          | 1  |          | 2  | 1        |    |          |    |    |    |    |    |
| Hm25        |          |          | 2  |          |    | 1        |    |          |    |    |    |    |    |
| Hm26        |          |          | 1  |          |    |          |    |          |    |    |    |    |    |
| Hm27        |          |          | 1  |          |    |          |    |          |    |    |    |    |    |
| Hm28        |          |          | 1  |          |    |          |    |          |    |    |    |    |    |
| Hm29        |          |          | 1  |          | 1  | 1        |    | 1        |    |    |    | 1  |    |
| <b>Hm30</b> |          |          |    | <b>1</b> |    |          |    |          |    |    |    |    |    |
| <b>Hm31</b> |          |          |    | <b>1</b> |    |          |    |          |    |    |    |    |    |
| <b>Hm32</b> |          |          |    | <b>1</b> |    |          |    |          |    |    |    |    |    |
| Hm33        |          |          |    |          | 1  |          |    |          |    |    |    |    |    |
| Hm34        |          |          |    |          | 1  |          |    |          |    |    |    |    |    |

|             |   |          |          |          |
|-------------|---|----------|----------|----------|
| Hm35        | 1 |          |          |          |
| Hm36        | 1 |          |          |          |
| Hm37        | 1 |          |          |          |
| Hm38        |   | 1        |          |          |
| <b>Hm39</b> |   | <b>1</b> |          |          |
| <b>Hm40</b> |   | <b>1</b> |          |          |
| Hm41        |   | 1        |          |          |
| <b>Hm42</b> |   | <b>1</b> |          |          |
| <b>Hm43</b> |   | <b>1</b> |          | <b>1</b> |
| Hm44        |   | 1        |          |          |
| Hm45        |   | 1        | 3        |          |
| Hm46        |   |          | 2        |          |
| Hm47        |   |          | 1        |          |
| Hm48        |   |          | 1        |          |
| Hm49        |   |          | 1        |          |
| Hm50        |   |          | 1        |          |
| Hm51        |   |          | 1        |          |
| Hm52        |   |          | 1        |          |
| Hm53        |   |          | 1        |          |
| Hm54        |   |          | 1        |          |
| Hm55        |   |          | 1        |          |
| Hm56        |   |          | 1        |          |
| Hm57        |   |          | 1        |          |
| <b>Hm58</b> |   |          | <b>1</b> |          |
| <b>Hm59</b> |   |          | <b>2</b> |          |
| <b>Hm60</b> |   |          | <b>1</b> |          |
| <b>Hm61</b> |   |          | <b>1</b> |          |
| <b>Hm62</b> |   |          | <b>1</b> |          |
| Hm63        |   |          | 1        |          |
| Hm64        |   |          | 1        |          |
| Hm65        |   |          | 1        |          |
| Hm66        |   |          | 2        | 3        |
| Hm67        |   |          | 1        | 1        |
| Hm68        |   |          | 1        |          |
| Hm69        |   |          | 1        |          |
| Hm70        |   |          |          | 4        |
| Hm71        |   |          |          | 1        |
| Hm72        |   |          |          | 1        |
| Hm73        |   |          |          | 2        |
| Hm74        |   |          |          | 2        |
| Hm75        |   |          |          | 1        |

---

|             |   |          |          |
|-------------|---|----------|----------|
| Hm76        | 1 |          |          |
| Hm77        | 2 |          |          |
| <b>Hm78</b> |   | <b>1</b> |          |
| <b>Hm79</b> |   | <b>1</b> |          |
| <b>Hm80</b> |   | <b>1</b> |          |
| <b>Hm81</b> |   | <b>1</b> |          |
| Hm82        |   |          | 1        |
| Hm83        |   |          | 1        |
| Hm84        |   |          | 1        |
| Hm85        |   |          | 1        |
| Hm86        |   |          | 1        |
| Hm87        |   |          | 1        |
| Hm88        |   |          | 1        |
| Hm89        |   |          | 1        |
| <b>Hm90</b> |   |          | <b>1</b> |
| <b>Hm91</b> |   |          | <b>1</b> |
| <b>Hm92</b> |   |          | <b>1</b> |
| Hm93        |   |          | 1        |
| Hm94        |   |          | 1        |

---

**Table S2.** The haplotype information downloaded from NCBI.

| IA         | IB         | ALONE        | IIA        | IIB        | IIC        |
|------------|------------|--------------|------------|------------|------------|
| LC316325.1 | KU849166.1 | LC316297.1   | KU848845.1 | KU848844.1 | KU848833.1 |
| LC316492.1 | KU849198.1 | LC316475.1   | KU849468.1 | KU849426.1 | KU849559.1 |
| 3089mlya1  | ZH19       | 1252mlhiro4  | DS10       | DS09       | CD22       |
| LC316326.1 | KU849169.1 | LC316281.1   | KU849101.1 |            | KU848943.1 |
| LC316493.1 | KU849180.1 | LC316462.1   | KU849255.1 |            | KU849377.1 |
| 3090mlya2  | ZH22       | 1421MLhmnk   | XP13       |            | JZ14       |
| KU848794.1 | KU849025.1 | LC316296.1   | KU848840.1 |            | KU848818.1 |
| KU849521.1 | KU849343.1 | LC316474.1   | KU849419.1 |            | KU849560.1 |
| BH09       | PT15       | 1251mlhiro3  | DS05       |            | CD06       |
| KU848795.1 | KU848843.1 | LC316282.1   | KU849097.1 |            | KU848814.1 |
| KU849494.1 | KU849462.1 | LC316463.1   | KU849246.1 |            | KU849558.1 |
| BH10       | DS08       | 1423MLhmnk   | XP09       |            | CD02       |
| KU848798.1 | KU849007.1 | LC316298.1   |            |            | KU849048.1 |
| KU849531.1 | KU849283.1 | LC316476.1   |            |            | KU849572.1 |
| BH13       | NB21       | 1255mlhiro6  |            |            | QD17       |
| KU848797.1 | KU848897.1 | LC316318.1   |            |            | KU849038.1 |
| KU849525.1 | KU849231.1 | LC316488.1   |            |            | KU849581.1 |
| BH12       | DT14       | 67Mltsushima |            |            | QD07       |
|            | KU848896.1 | LC316319.1   |            |            | KU848945.1 |
|            | KU849172.1 | LC316489.1   |            |            | KU849335.1 |
|            | DT13       | 68Mltsushima |            |            | JZ16       |
|            | KU848774.1 | LC316322.1   |            |            | KU848946.1 |
|            | KU849303.1 | LC316490.1   |            |            | KU849318.1 |
|            | AJ06       | 3648mlfuku1  |            |            | JZ17       |
|            | KU849167.1 | LC316323.1   |            |            | KU848944.1 |
|            | KU849207.1 | LC316491.1   |            |            | KU849323.1 |
|            | ZH20       | 3650mlfuku3  |            |            | JZ15       |
|            | KU849005.1 |              |            |            | KU848829.1 |
|            | KU849331.1 |              |            |            | KU849565.1 |
|            | NB19       |              |            |            | CD17       |
|            | KU848842.1 |              |            |            | KU848826.1 |
|            | KU849453.1 |              |            |            | KU849557.1 |

---

|            |                  |
|------------|------------------|
| DS07       | CD14             |
| KU849024.1 | KU848947.1       |
| KU849325.1 | KU849366.1       |
| PT14       | JZ18             |
|            | LC316264.1       |
|            | LC316450.1       |
|            | <i>Monodonta</i> |
|            | <i>confusa</i>   |
|            | mcak1            |
| KU849004.1 | LC316264.1       |
| KU849368.1 | LC316450.1       |
| NB18       | <i>Monodonta</i> |
|            | <i>confusa</i>   |
|            | mcak1            |
|            | LC316261.1       |
|            | LC316448.1       |
|            | <i>Monodonta</i> |
|            | <i>confusa</i>   |
|            | 779mcawa         |
| KU848841.1 |                  |
| KU849460.1 |                  |
| DS06       |                  |
| KU848771.1 |                  |
| KU849374.1 |                  |
| AJ03       |                  |
| KU849022.1 |                  |
| KU849391.1 |                  |
| PT12       |                  |
| KU849008.1 |                  |
| KU849312.1 |                  |
| NB22       |                  |
| KU848772.1 |                  |
| KU849381.1 |                  |

---

---

AJ04

KU848894.1

KU849193.1

DT11

KU848894.1

KU849193.1

DT11

KU849023.1

KU849250.1

PT13

KU849006.1

KU849345.1

NB20

U849021.1

KU849393.1

PT11

MF979254.1

MF979294.1

DCL4

KU849102.1

KU849363.1

XP14

KU848895.1

KU849230.1

DT12

KU849098.1

KU849401.1

XP10

KU848893.1

KU849209.1

DT10

KU848773.1

KU849376.1

AJ05

---

---

MF979253.1

MF979293.1

DCL3

KU849170.1

KU849192.1

ZH23

---

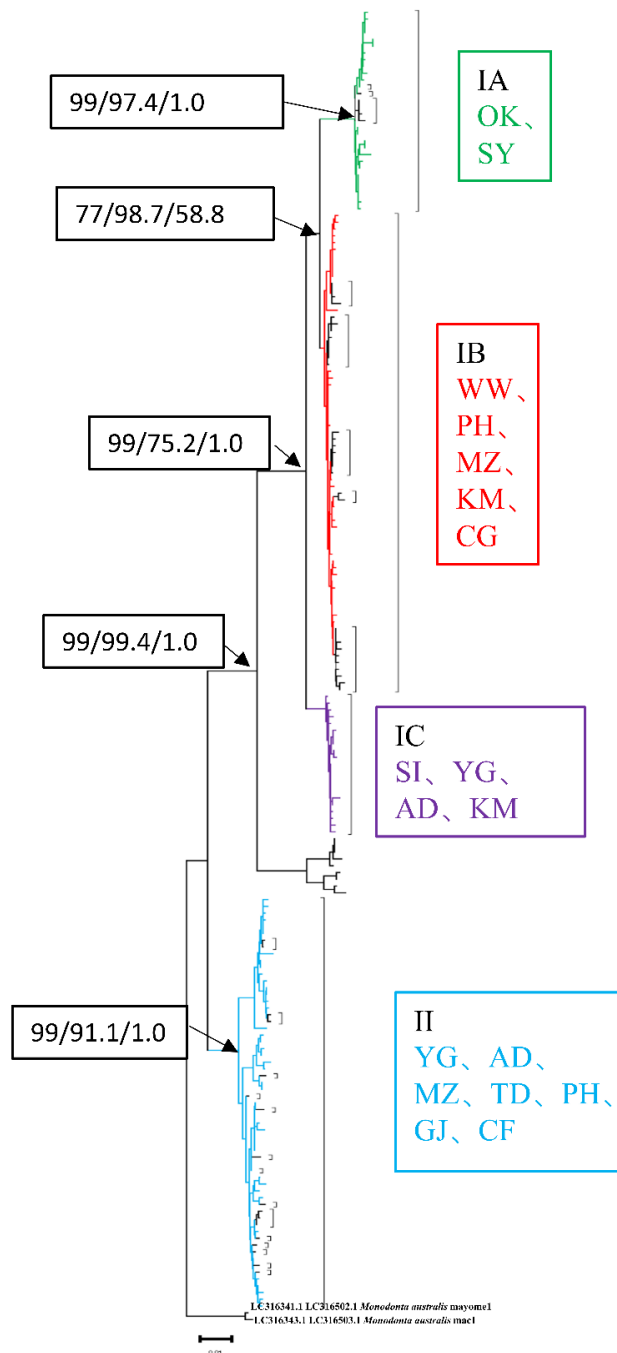

Figure S1. The phylogeny of *Monodonta labio* (Lineage I) and *M. confusa* (Lineage II) was reconstructed using neighbor-joining (NJ) analyses based on the mitochondrial COI + 16S gene. This analysis involved a total of 126 haplotypes, including 68 sequences obtained from NCBI and 94 haplotypes derived from our study. The numbers above each branch are the posterior probabilities for bootstrap values for the NJ, ML, and Bayesian analyses. The haplotypes marked in black on the phylogenetic tree are haplotypes downloaded from NCBI. Please refer to the table S2 for the haplotype information downloaded from NCBI.
